# Supplementary material
Source: Springer Nature journal article supplement (https://www.springermedizin.de/resource/supplementary/12872_2013_662_MOESM1_ESM.pdf/9430674)

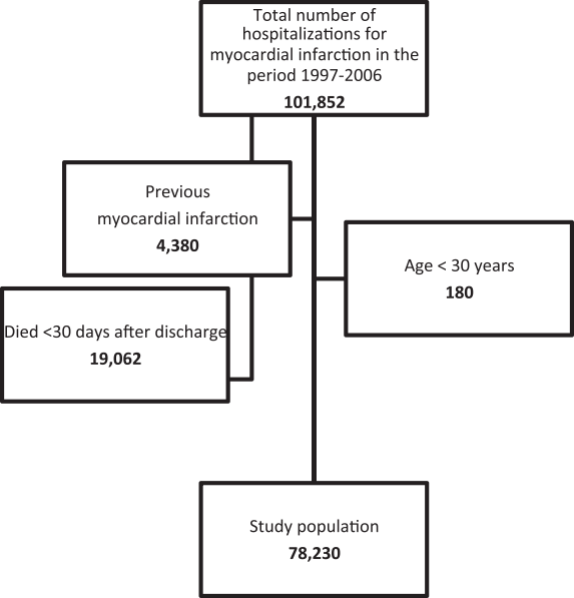

Supplement: MOESM1 [file 9430674]
